# Supplementary material for: A Compendium of Nucleosome and Transcript Profiles Reveals Determinants of Chromatin Architecture and Transcription
Source: PubMed Central journal article supplement (PMC3642058; doi:10.1371/journal.pgen.1003479), 2013-05-02

Figure S7

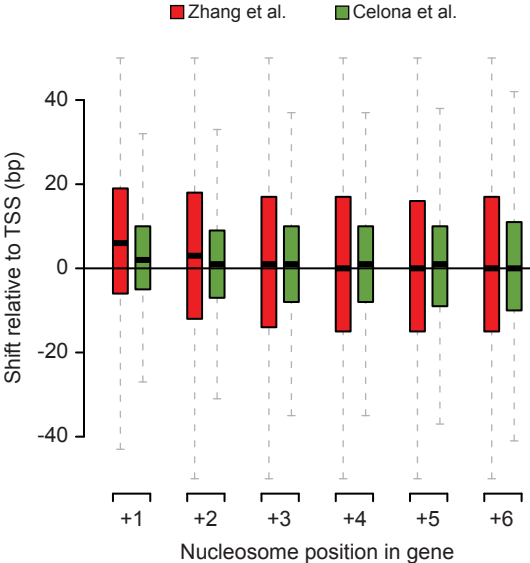

Supplement: pgen.1003479.s008.pdf [file pgen.1003479.s008.pdf]
